# Supplementary material for: New horizons in microbiological food safety: Photodynamic Decontamination based on a curcumin derivative
Source: Royal Society of Chemistry journal article supplement (doi:10.1039/c7pp00165g), 2017-11-06
Supplement: c7pp00165g1.pdf [file c7pp00165g1.pdf]

|                                | Co -/-<br>bacterial<br>count<br>(standard<br>deviation)<br>[CFU] | PS only                                    | light only           | PDc 10 $\mu$ M       | PDc 50 $\mu$ M       | PDc 100 $\mu$ M      |
|--------------------------------|------------------------------------------------------------------|--------------------------------------------|----------------------|----------------------|----------------------|----------------------|
|                                |                                                                  | relative inactivation (standard deviation) |                      |                      |                      |                      |
| <b>cucumber</b>                | 8.2E+07<br>(9.1E+06)                                             | 1.4E+00<br>(4.6E-01)                       | 1.0E+00<br>(2.3E-01) | 1.8E+03<br>(6.2E+02) | 1.7E+04<br>(1.1E+04) | 3.4E+04<br>(3.4E+04) |
| <b>tomato</b>                  | 2.5E+08<br>(1.9E+08)                                             | 5.1E+00<br>(2.4E+00)                       | 2.2E+00<br>(7.4E-01) | 1.7E+03<br>(1.8E+03) | 1.0E+06<br>(1.8E+06) | 2.1E+03<br>(1.9E+03) |
| <b>lettuce</b>                 | 4.6E+07<br>(3.7E+07)                                             | 2.8E+00<br>(1.1E+00)                       | 9.4E-01<br>(4.1E-01) | 3.0E+03<br>(5.0E+03) | 5.6E+06<br>(9.5E+06) | 1.6E+06<br>(2.5E+06) |
| <b>fenugreek<br/>seed</b>      | 7.3E+05<br>(4.1E+05)                                             | 5.9E+00<br>(3.2E+00)                       | 2.1E+00<br>(2.2E+00) | 8.8E+02<br>(1.5E+03) | 1.2E+05<br>(1.5E+05) | 5.5E+04<br>(1.0E+05) |
| <b>mung<br/>beans</b>          | 1.4E+06<br>(1.3E+06)                                             | 9.3E+00<br>(8.4E+00)                       | 1.3E+00<br>(1.1E+00) | 2.6E+02<br>(2.4E+02) | 1.9E+02<br>(2.7E+01) | 5.0E+03<br>(8.3E+03) |
| <b>mung bean<br/>germlings</b> | 9.6E+06<br>(3.7E+06)                                             | 1.9E+00<br>(3.1E-01)                       | 6.1E-01<br>(1.9E-01) | 5.2E+00<br>(4.3E+00) | 7.9E+00<br>(7.7E+00) | 5.1E+00<br>(5.7E-01) |

**Supplementary table 1**

**Supplementary table 1 :** Results of Photodynamic Decontamination of *E. coli* on different substrates. PDc was done at three different concentrations (10  $\mu$ M, 50  $\mu$ M, 100  $\mu$ M) of SA-CUR-3 using a 435 nm LED-array (radiant fluence 33.8 J cm<sup>-2</sup>, irradiance 9.4 mW cm<sup>-2</sup>). Counting of CFU took place 24 h after illumination. The mean value and the standard deviation were calculated from at least three biological independent replicates. Three controls were included in this experiment. Co -/-: double negative control; PS only: dark control; light only: light control.
